# Supplementary material for: Increased Risk of Severe Hypoglycemic Events Before and After Cardiovascular Outcomes in TECOS Suggests an At-Risk Type 2 Diabetes Frail Patient Phenotype
Source: Oxford University Press journal article supplement (doi:10.2337/dc17-1778), 2018-01-08
Supplement: dc171778supplementarydata.pdf [file dc171778supplementarydata.pdf]

SUPPLEMENTARY DATA

**Supplementary Table 1. Association between severe hypoglycaemic events (SHEs) and subsequent major adverse cardiovascular event (MACE) or death outcomes in cardiovascular outcome trials**

|               | <b>Total population or subgroup in trial</b> | <b>MACE/death outcomes</b>    | <b>Adj. HR (95% CI)</b> |
|---------------|----------------------------------------------|-------------------------------|-------------------------|
| VADT          | All                                          | Cardiovascular mortality      | 4.04 (1.45-11.28)†      |
| ACCORD        | Intensive arm                                | Annualized mortality          | 1.41 (1.03-1.93)        |
|               | Standard arm                                 | Annualized mortality          | 2.30 (1.46-3.65)        |
| ADVANCE       | All                                          | 3-point MACE                  | 2.88 (2.01-4.12)        |
|               |                                              | Cardiovascular death          | 2.68 (1.72-4.19)        |
|               |                                              | All-cause death               | 2.69 (1.97-3.67)        |
| ORIGIN        | All                                          | 3-point MACE                  | 1.58 (1.24–2.02)        |
|               |                                              | Cardiovascular death          | 1.71 (1.27–2.30)        |
|               |                                              | All-cause death               | 1.74 (1.39–2.19)        |
| SAVOR-TIMI 53 | All                                          | CV death                      | 1.81 (1.06-2.87)        |
|               |                                              | Heart failure hospitalisation | 2.42 (1.27-4.60)        |
| EXAMINE       | All                                          | 3-point MACE                  | 1.80 (1.04-2.89)        |

The time sequence for an SHE after a non-fatal MACE has not been evaluated at all.

ACCORD=Action to Control Cardiovascular Risk in Diabetes; ADVANCE=Action in Diabetes and Vascular Disease: Preterax and Diamicron MR Controlled Evaluation; EXAMINE=Examination of Cardiovascular Outcomes with Alogliptin versus Standard of Care; ORIGIN=Outcome Reduction with an Initial Glargine Intervention; SAVOR-TIMI 53=Saxagliptin Assessment of Vascular Outcomes Recorded in Patients with Diabetes Mellitus–Thrombolysis in Myocardial Infarction 53; VADT=Veterans Affairs Diabetes Trial.

\*Cardiovascular death, non-fatal myocardial infarction/stroke. †Unadjusted.

SUPPLEMENTARY DATA

**Supplementary Table 2. Baseline characteristics for participants with SHEs who had or did not have a CV event (intention-to-treat population)**

|                                                        | Without a CV Event<br>(N=235) | With a CV Event<br>(N=68) |
|--------------------------------------------------------|-------------------------------|---------------------------|
| Age at Randomisation (years) <sup>1</sup>              |                               |                           |
| Mean (SD)                                              | 66.9 (8.3)                    | 67.9 (7.7)                |
| <65 years                                              | 90 / 231 (39.0%)              | 19 / 67 (28.4%)           |
| >=65 years                                             | 141 / 231 (61.0%)             | 48 / 67 (71.6%)           |
| <70 years                                              | 138 / 231 (59.7%)             | 38 / 67 (56.7%)           |
| >=70 years                                             | 93 / 231 (40.3%)              | 29 / 67 (43.3%)           |
| Sex                                                    |                               |                           |
| Male                                                   | 150 / 235 (63.8%)             | 43 / 68 (63.2%)           |
| Female                                                 | 85 / 235 (36.2%)              | 25 / 68 (36.8%)           |
| Race                                                   |                               |                           |
| White                                                  | 136 / 235 (57.9%)             | 40 / 68 (58.8%)           |
| Black                                                  | 13 / 235 (5.5%)               | 8 / 68 (11.8%)            |
| Asian                                                  | 59 / 235 (25.1%)              | 15 / 68 (22.1%)           |
| Other                                                  | 27 / 235 (11.5%)              | 5 / 68 (7.4%)             |
| Duration <sup>2</sup> of type 2 diabetes (years)       |                               |                           |
| Median (Q1, Q3)                                        | 14.0 (7.0, 22.0)              | 13.5 (8.0, 22.5)          |
| Diabetes duration 15 years or more                     | 113 / 235 (48.1%)             | 33 / 68 (48.5%)           |
| Diabetes therapy at baseline (alone or in combination) |                               |                           |
| Sulfonylurea                                           | 110 / 235 (46.8%)             | 30 / 68 (44.1%)           |
| Metformin                                              | 177 / 235 (75.3%)             | 49 / 68 (72.1%)           |
| Thiazolidinedione (includes Pioglitazone)              | 7 / 235 (3.0%)                | 1 / 68 (1.5%)             |
| Insulin                                                | 97 / 235 (41.3%)              | 32 / 68 (47.1%)           |
| Not on Sulfonylurea or Insulin                         | 33 / 235 (14.0%)              | 7 / 68 (10.3%)            |
| Pre-existing vascular disease                          | 234 / 235 (99.6%)             | 68 / 68 (100.0%)          |
| Prior MI                                               | 85 / 235 (36.2%)              | 33 / 68 (48.5%)           |
| Prior congestive heart failure                         | 37 / 235 (15.7%)              | 17 / 68 (25.0%)           |
| Current smoking                                        | 22 / 235 (9.4%)               | 3 / 68 (4.4%)             |
| Qualifying HbA1c (mmol/mol)                            |                               |                           |
| Median (Q1, Q3)                                        | 56.3 (51.9, 60.7)             | 55.2 (51.5, 60.1)         |
| Qualifying HbA1c (%)                                   |                               |                           |
| Median (Q1, Q3)                                        | 7.3 (6.9, 7.7)                | 7.2 (6.9, 7.7)            |
| Qualifying HbA1c categories                            |                               |                           |
| <7%                                                    | 66 / 235 (28.1%)              | 21 / 68 (30.9%)           |
| 7 - <7.5%                                              | 79 / 235 (33.6%)              | 18 / 68 (26.5%)           |
| >=7.5%                                                 | 90 / 235 (38.3%)              | 29 / 68 (42.6%)           |
| eGFR (mL/min/1.73m <sup>2</sup> )                      |                               |                           |
| Median (Q1, Q3)                                        | 66.0 (54.0, 85.5)             | 60.0 (47.0, 71.0)         |
| Renal function <sup>3</sup>                            |                               |                           |
| eGFR <60 mL/min/1.73m <sup>2</sup>                     | 78 / 232 (33.6%)              | 33 / 68 (48.5%)           |
| eGFR >=60 mL/min/1.73m <sup>2</sup>                    | 154 / 232 (66.4%)             | 35 / 68 (51.5%)           |
| UACR categories                                        |                               |                           |
| <30 g/mol Creatinine                                   | 60 / 104 (57.7%)              | 13 / 26 (50.0%)           |
| 30 - <300 g/mol Creatinine                             | 38 / 104 (36.5%)              | 8 / 26 (30.8%)            |
| >=300 g/mol Creatinine                                 | 6 / 104 (5.8%)                | 5 / 26 (19.2%)            |
| Systolic blood pressure (mmHg)                         |                               |                           |
| Mean (SD)                                              | 135.8 (19.1)                  | 140.0 (18.2)              |
| Diastolic blood pressure (mmHg)                        |                               |                           |
| Median (Q1, Q3)                                        | 75.2 (11.4)                   | 74.9 (11.5)               |
| Body mass index categories                             |                               |                           |
| <25 kg/m <sup>2</sup>                                  | 48 / 233 (20.6%)              | 7 / 68 (10.3%)            |
| 25 - <30 kg/m <sup>2</sup>                             | 88 / 233 (37.8%)              | 33 / 68 (48.5%)           |
| 30 - <35 kg/m <sup>2</sup>                             | 61 / 233 (26.2%)              | 15 / 68 (22.1%)           |
| >=35 kg/m <sup>2</sup>                                 | 36 / 233 (15.5%)              | 13 / 68 (19.1%)           |
| Weight (kg)                                            |                               |                           |
| Mean (SD)                                              | 81.1 (19.1)                   | 84.7 (20.7)               |
| Medications taken at time of randomisation             |                               |                           |
| Statins                                                | 196 / 235 (83.4%)             | 61 / 68 (89.7%)           |
| ACE inhibitors or angiotensin receptor blockers        | 185 / 235 (78.7%)             | 56 / 68 (82.4%)           |
| Diuretics                                              | 103 / 235 (43.8%)             | 41 / 68 (60.3%)           |

## SUPPLEMENTARY DATA

|                            | <b>Without a CV Event<br/>(N=235)</b> | <b>With a CV Event<br/>(N=68)</b> |
|----------------------------|---------------------------------------|-----------------------------------|
| Calcium channel blockers   | 84 / 235 (35.7%)                      | 25 / 68 (36.8%)                   |
| Beta blockers              | 144 / 235 (61.3%)                     | 50 / 68 (73.5%)                   |
| Aspirin                    | 192 / 235 (81.7%)                     | 53 / 68 (77.9%)                   |
| Other platelet antagonists | 54 / 235 (23.0%)                      | 23 / 68 (33.8%)                   |

1: Age is missing among patients enrolled in Lithuania because the entire birth date including year was not available.

2: Duration = (year of randomisation - year of diagnosis) + 1.

3: MDRD formula was used to calculate the eGFR. Site reported values are presented in the table.
